# Supplementary material
Source: PubMed Central journal article supplement (PMC8010912)
Supplement: NIHMS1556808-supplement-1.pdf [file NIHMS1556808-supplement-1.pdf]

## Supplement:

Table 1. Demographic characteristics and Serological Markers Among a Sickle Cell Disease Cohort in Brazil (n=2,779)

|                                                      | HCV +<br>n=69 (%) | Syphilis +<br>n=34 (%) | HTLV +<br>n=17 (%) | HBV +<br>n=13 (%) | Chagas +<br>n=13 (%) | HIV +<br>n=8 (%) | Any infectious<br>disease<br>marker n=144<br>(%) | Negative<br>for these<br>markers<br>n=2,635 (%) |
|------------------------------------------------------|-------------------|------------------------|--------------------|-------------------|----------------------|------------------|--------------------------------------------------|-------------------------------------------------|
| <b>Blood center</b>                                  | ‡                 |                        |                    |                   |                      |                  | ‡                                                | ‡                                               |
| Hemominas HB                                         | 7 (0.9)           | 7 (0.9)                | 3 (0.4)            | 6 (0.8)           | 4 (0.5)              | 1 (0.1)          | 26 (3.3)                                         | 754 (96.7)                                      |
| Hemominas JF                                         | 4 (1.5)           | 5 (1.9)                | 1 (0.4)            | 1 (0.4)           | 0 (0.0)              | 1 (0.4)          | 11 (4.0)                                         | 262 (96.0)                                      |
| Hemominas MO                                         | 2 (0.6)           | 3 (0.9)                | 0 (0.0)            | 1 (0.3)           | 7 (2.0)              | 1 (0.3)          | 14 (3.9)                                         | 349 (96.1)                                      |
| Hemope                                               | 22 (4.1)          | 6 (1.2)                | 9 (1.7)            | 3 (0.6)           | 2 (0.4)              | 1 (0.2)          | 41 (7.5)                                         | 509 (92.5)                                      |
| Hemorio                                              | 34 (4.9)          | 13 (1.9)               | 4 (0.6)            | 2 (0.3)           | 0 (0.0)              | 4 (0.6)          | 52 (7.3)                                         | 658 (92.7)                                      |
| Instituto da<br>Criança (children<br>only)           | 0 (0.0)           | 0 (0.0)                | 0 (0.0)            | 0 (0.0)           | 0 (0.0)              | 0 (0.0)          | 0 (0.0)                                          | 103 (100.0)                                     |
| <b>Gender</b>                                        |                   |                        |                    |                   |                      |                  |                                                  |                                                 |
| Male                                                 | 28 (2.2)          | 9 (0.7)                | 6 (0.5)            | 8 (0.6)           | 6 (0.5)              | 2 (0.2)          | 57 (4.4)                                         | 1,250 (95.6)                                    |
| Female                                               | 41 (2.9)          | 25 (1.8)               | 11 (0.8)           | 5 (0.4)           | 7 (0.5)              | 6 (0.4)          | 87 (5.9)                                         | 1,385 (94.1)                                    |
| <b>SCD genotype*</b>                                 |                   |                        |                    |                   |                      |                  |                                                  |                                                 |
| SS/SB <sup>0</sup> /SDL                              | 60 (3.0)          | 23 (1.2)               | 15 (0.8)           | 12 (0.6)          | 8 (0.4)              | 7 (0.4)          | 117 (5.6)                                        | 1,973 (94.4)                                    |
| SC                                                   | 8 (1.3)           | 11 (1.8)               | 2 (0.3)            | 0 (0.0)           | 5 (0.8)              | 1 (0.2)          | 25 (3.9)                                         | 617 (96.1)                                      |
| SB+/SHPFH                                            | 1 (2.2)           | 0 (0.0)                | 0 (0.0)            | 1 (2.2)           | 0 (0.0)              | 0 (0.0)          | 2 (4.3)                                          | 45 (95.7)                                       |
| <b>Education (1,231<br/>Adults only)</b>             |                   |                        |                    |                   |                      |                  |                                                  |                                                 |
| Never attended                                       | 0 (0.0)           | 0 (0.0)                | 0 (0.0)            | 0 (0.0)           | 2 (20.0)             | 0 (0.0)          | 2 (20.0)                                         | 8 (80)                                          |
| Elementary/Middle<br>School                          | 50 (5.3)          | 30 (3.3)               | 10 (1.1)           | 10 (1.1)          | 9 (1.0)              | 6 (0.7)          | 108 (10.8)                                       | 892 (89.2)                                      |
| Adult<br>Literacy/Technical<br>school                | 9 (11.8)          | 0 (0.0)                | 2 (2.9)            | 1 (1.5)           | 2 (2.9)              | 0 (0.0)          | 13 (16.3)                                        | 67 (83.8)                                       |
| Bachelors, Masters<br>or Doctorate College<br>Degree | 9 (6.8)           | 3 (2.4)                | 4 (3.1)            | 0 (0.0)           | 0 (0.0)              | 1 (0.8)          | 15 (10.8)                                        | 124 (89.2)                                      |
| Missing/ Unknown                                     | 0 (0.0)           | 0 (0.0)                | 0 (0.0)            | 0 (0.0)           | 0 (0.0)              | 0 (0.0)          | 0 (0.0)                                          | 2 (0.2)                                         |
| <b>Race</b>                                          |                   |                        |                    |                   |                      |                  |                                                  |                                                 |
| Asian                                                | 3 (3.3)           | 0 (0.0)                | 0 (0.0)            | 0 (0.0)           | 0 (0.0)              | 0 (0.0)          | 3 (3.3)                                          | 87 (96.7)                                       |
| Black                                                | 25 (3.5)          | 9 (1.3)                | 7 (1.0)            | 2 (0.3)           | 3 (0.4)              | 2 (0.3)          | 45 (6.0)                                         | 699 (94)                                        |
| Indigenous                                           | 0 (0.0)           | 0 (0.0)                | 0 (0.0)            | 0 (0.0)           | 0 (0.0)              | 0 (0.0)          | 0 (0.0)                                          | 14 (100)                                        |
| Mixed                                                | 38 (2.4)          | 21 (1.3)               | 8 (0.5)            | 10 (0.6)          | 9 (0.6)              | 6 (0.4)          | 85 (5.2)                                         | 1,546 (94.8)                                    |
| White                                                | 3 (1.0)           | 4 (1.4)                | 2 (0.7)            | 1 (0.4)           | 1 (0.4)              | 0 (0.0)          | 11 (3.7)                                         | 284 (96.3)                                      |
| Missing/ Unknown                                     | 0 (0.0)           | 0 (0.0)                | 0 (0.0)            | 0 (0.0)           | 0 (0.0)              | 0 (0.0)          | 0 (0.0)                                          | 5 (0.2)                                         |
| <b>Age</b>                                           | ‡                 | §                      | ‡                  | §                 | §                    |                  | ‡                                                | ‡                                               |
| <15                                                  | 1 (0.1)           | 1 (0.1)                | 1 (0.1)            | 1 (0.1)           | 0 (0.0)              | 1 (0.1)          | 5 (0.4)                                          | 1,260 (99.6)                                    |
| 15-24                                                | 1 (0.1)           | 5 (0.7)                | 1 (0.1)            | 2 (0.3)           | 0 (0.0)              | 2 (0.3)          | 11 (1.6)                                         | 668 (98.4)                                      |
| 25-34                                                | 16 (4.2)          | 6 (1.6)                | 3 (0.8)            | 4 (1.1)           | 2 (0.5)              | 2 (0.5)          | 32 (8.1)                                         | 365 (91.9)                                      |
| 35-44                                                | 23 (10.0)         | 13 (5.9)               | 5 (2.4)            | 3 (1.4)           | 7 (3.3)              | 2 (1.0)          | 48 (18.9)                                        | 206 (81.1)                                      |
| 45-54                                                | 15 (13.8)         | 4 (4.1)                | 7 (6.9)            | 3 (3.1)           | 2 (2.1)              | 1 (1.1)          | 28 (23.0)                                        | 94 (77.0)                                       |

|                                            |           |          |         |         |         |         |           |            |
|--------------------------------------------|-----------|----------|---------|---------|---------|---------|-----------|------------|
| 50+                                        | 13 (23.6) | 5 (10.6) | 0 (0.0) | 0 (0.0) | 2 (4.5) | 0 (0.0) | 20 (32.3) | 42 (67.7)  |
| <b>Marital status (1,231 Adults only)</b>  | ‡         |          |         |         |         |         | ‡         | ‡          |
| Single                                     | 18 (2.7)  | 16 (2.4) | 7 (1.1) | 4 (0.6) | 6 (0.9) | 5 (0.8) | 53 (7.6)  | 645 (92.4) |
| Living together/married                    | 34 (7.8)  | 14 (3.4) | 8 (2.0) | 6 (1.5) | 5 (1.2) | 2 (0.5) | 63 (45.7) | 402 (86.5) |
| Separated/Divorced/Widower                 | 16 (26.7) | 3 (6.4)  | 1 (2.2) | 1 (2.2) | 2 (4.3) | 0 (0.0) | 22 (15.9) | 44 (66.7)  |
| Missing/ Unknown                           | 0 (0.0)   | 0 (0.0)  | 0 (0.0) | 0 (0.0) | 0 (0.0) | 0 (0.0) | 0 (0.0)   | 2 (0.2)    |
| <b>Monthly Income (1,231 Adults only)†</b> |           |          |         |         |         |         |           |            |
| <=R\$1400                                  | 46 (6.0)  | 26 (3.5) | 8 (1.1) | 6 (0.8) | 7 (1.0) | 4 (0.6) | 94 (11.6) | 717 (88.4) |
| >R\$1401                                   | 20 (5.8)  | 6 (1.8)  | 8 (2.4) | 5 (1.5) | 5 (1.5) | 3 (0.9) | 41 (11.2) | 325 (88.8) |
| Missing/unknown                            | 2 (0.03)  | 1 (0.0)  | 0 (0.0) | 0 (0.0) | 1 (7.7) | 0 (0.0) | 3 (2.2)   | 51 (4.7)   |

\*More severe SCD genotypes such as homozygous SS, Sβ0-thalassemia(Sβ0) and S-D Los Angeles (SDL) were combined into one category while less severe genotypes such as Sβ+-thalassemia(Sβ+) and S-hereditary persistence of fetal hemoglobin (SHPFH) were combined into a separate category. †Monthly income was collected in Brazilian Reais. in 2014, R\$1400 was equivalent to approximately \$527 US dollars; ‡p<0.0001; §p<0.001; ||p<0.05
